# Supplementary material for: Cognitive Aid for Anesthetic Preparation in An Emergency Situation: A Simulation-Based Study
Source: MDPI journal article supplement (doi:10.3390/healthcare9121646), 2021-11-27

## Supplementary Materials

**Figure. S1.** Percentages of residents (n = 32) who validated each required item in the first 5 minutes, in phase 1 and phase 2. \*, p <0.05 between the 2 phases.

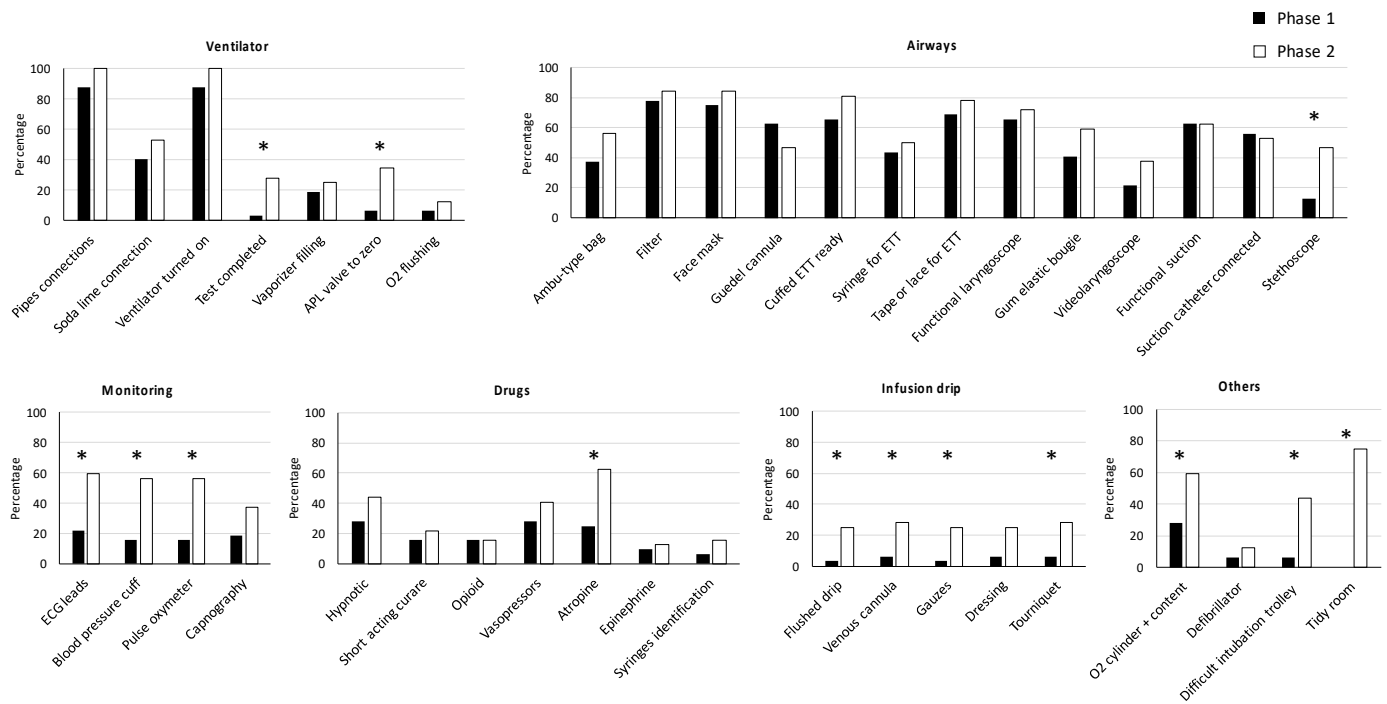

**Figure S2.** Percentages of residents (n = 32) who validated each required item, without time limit, in phase 1 and phase 2. \*, p <0.05 between the 2 phases.

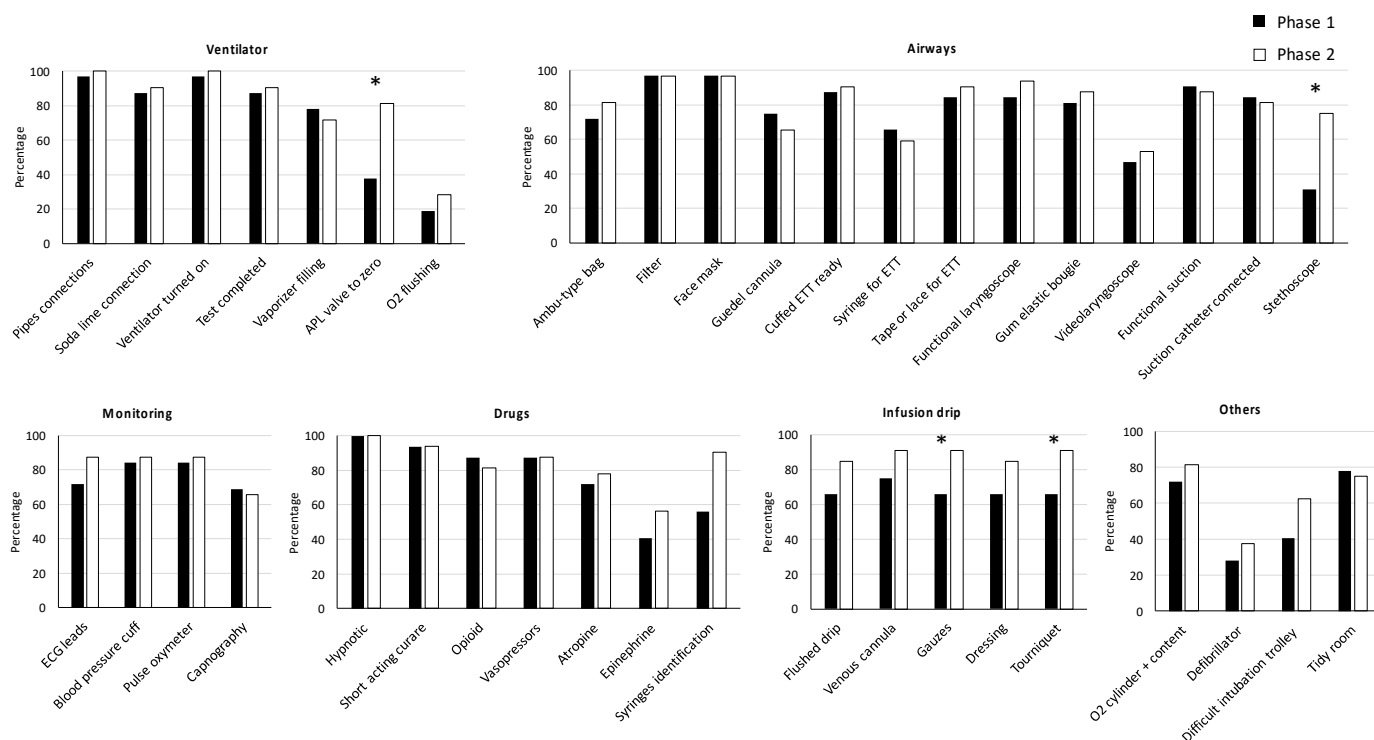

Supplement: s1 [file s1]
